# Supplementary material
Source: PubMed Central journal article supplement (PMC5553035)
Supplement: JB.00100-17_zjb999094502s1.pdf [file JB.00100-17_zjb999094502s1.pdf]

1 **Supplementary Movies 1-10.** The movies show all figure panels going slice-by-slice through the  
2 Z-stack of the tomogram. Accompanying models are provided when a three-dimensional view is  
3 helpful for interpreting the structure. <https://figshare.com/s/782461843c3150d27cfa>

4  
5 **Supplementary Table 1. Species range and frequency of structures observed.** Prevalence of  
6 described structures in our database is reported. Note that this is not an exhaustive list, and  
7 statistics for very common features (such as single or paired filaments) are not reported. Some  
8 tomograms contained multiple copies of a structure, and we did not complete an exhaustive  
9 search for common structures, so the indicated counts represent lower limits. Column IDs: “#” =  
10 number of tomograms the structures were seen in. “%” = percent of tomograms viewed of that  
11 species that contained the structure.

12

| Feature              | Species                                              | Taxon                      | #  | %     |
|----------------------|------------------------------------------------------|----------------------------|----|-------|
| Surface appendages   | <i>Prostheco bacter debontii</i>                     | <i>Verrucomicrobia</i>     | 6  | 4.6   |
| Surface hooks        | <i>Azospirillum brasilense</i> WT                    | $\alpha$ -proteobacteria   | 20 | 95.2  |
|                      | <i>A. brasilense</i> $\Delta$ cheOp1                 | $\alpha$ -proteobacteria   | 24 | 92.3  |
|                      | <i>A. brasilense</i> $\Delta$ cheOp4                 | $\alpha$ -proteobacteria   | 9  | 52.9  |
|                      | <i>A. brasilense</i> $\Delta$ cheOp1 $\Delta$ cheOp4 | $\alpha$ -proteobacteria   | 0  | 0     |
| Polar fimbriae       | Strain JT5 ( <i>Dysgonomonas</i> )                   | <i>Bacteroidetes</i>       | 41 | 100   |
| Nanospheres          | <i>Vibrio cholerae</i>                               | $\gamma$ -proteobacteria   | 2  | 0.1   |
| Filament bundles     | <i>Agrobacterium tumefaciens</i>                     | $\alpha$ -proteobacteria   | 1  | < 0.1 |
|                      | <i>Borrelia burgdorferi</i>                          | <i>Spirochaetes</i>        | 1  | 2.2   |
|                      | <i>Campylobacter jejuni</i>                          | $\epsilon$ -proteobacteria | 2  | 3.3   |
|                      | <i>Caulobacter crescentus</i>                        | $\alpha$ -proteobacteria   | 1  | < 0.1 |
|                      | <i>Escherichia coli</i>                              | $\gamma$ -proteobacteria   | 1  | 0.1   |
|                      | <i>Halothiobacillus neapolitanus</i> c2              | $\gamma$ -proteobacteria   | 5  | 2.6   |
|                      | <i>Helicobacter pylori</i>                           | $\epsilon$ -proteobacteria | 2  | 2.1   |
|                      | <i>Hylemonella gracilis</i>                          | $\beta$ -proteobacteria    | 1  | 0.9   |
|                      | <i>Hyphomonas neptunium</i>                          | $\alpha$ -proteobacteria   | 32 | 2.7   |
|                      | <i>Mycobacterium smegmatis</i>                       | <i>Actinobacteria</i>      | 5  | 5.8   |
|                      | <i>Myxococcus xanthus</i>                            | $\delta$ -proteobacteria   | 1  | 0.1   |
|                      | <i>Prostheco bacter debontii</i>                     | <i>Verrucomicrobia</i>     | 2  | 1.5   |
|                      | <i>Prostheco bacter fluviatilis</i>                  | <i>Verrucomicrobia</i>     | 5  | 3.6   |
|                      | <i>Prostheco bacter vanneervanii</i>                 | <i>Verrucomicrobia</i>     | 4  | 2.3   |
|                      | <i>Thiomonas intermedia</i>                          | $\beta$ -proteobacteria    | 3  | 6.7   |
|                      | <i>Vibrio cholerae</i>                               | $\gamma$ -proteobacteria   | 10 | 0.8   |
|                      | <i>Shewanella putrefaciens</i>                       | $\gamma$ -proteobacteria   | 1  | 6.3   |
| Tubes                | <i>Bdellovibrio bacteriovorus</i>                    | $\delta$ -proteobacteria   | 1  | 0.3   |
|                      | <i>Halothiobacillus neapolitanus</i> c2              | $\gamma$ -proteobacteria   | 1  | 0.5   |
|                      | <i>Hyphomonas neptunium</i>                          | $\alpha$ -proteobacteria   | 7  | 0.6   |
|                      | <i>Prostheco bacter vanneervanii</i>                 | <i>Verrucomicrobia</i>     | 1  | 0.6   |
|                      | <i>Thiomicrospira crunogena</i>                      | $\gamma$ -proteobacteria   | 2  | 9.1   |
|                      | <i>Thiomonas intermedia</i>                          | $\beta$ -proteobacteria    | 1  | 2.2   |
| Ring array           | <i>Helicobacter pylori</i>                           | $\epsilon$ -proteobacteria | 1  | 1     |
| Vesicles - horseshoe | <i>Caulobacter crescentus</i>                        | $\alpha$ -proteobacteria   | 8  | 0.4   |
|                      | <i>Hyphomonas neptunium</i>                          | $\alpha$ -proteobacteria   | 1  | 0.1   |
|                      | <i>Magnetospirillum magneticum</i>                   | $\alpha$ -proteobacteria   | 1  | 0.2   |
|                      | <i>Myxococcus xanthus</i>                            | $\delta$ -proteobacteria   | 2  | 0.1   |
|                      | <i>Prostheco bacter fluviatilis</i>                  | <i>Verrucomicrobia</i>     | 2  | 1.4   |

|                                         |                                      |                                  |                          |       |
|-----------------------------------------|--------------------------------------|----------------------------------|--------------------------|-------|
|                                         | <i>Prostheco bacter vanneervanii</i> | <i>Verrucomicrobia</i>           | 1                        | 0.6   |
|                                         | <i>Ralstonia eutropha</i>            | $\beta$ -proteobacteria          | 1                        | 1.6   |
|                                         | <i>Thiomonas intermedia</i>          | $\beta$ -proteobacteria          | 2                        | 4.4   |
| Vesicles - flattened                    | <i>Agrobacterium tumefaciens</i>     | $\alpha$ -proteobacteria         | 1                        | < 0.1 |
|                                         | <i>Caulobacter crescentus</i>        | $\alpha$ -proteobacteria         | 78                       | 3.6   |
|                                         | <i>Escherichia coli</i>              | $\gamma$ -proteobacteria         | 1                        | 0.1   |
|                                         | <i>Helicobacter pylori</i>           | $\epsilon$ -proteobacteria       | 16                       | 2.9   |
|                                         | <i>Hyphomonas neptunium</i>          | $\alpha$ -proteobacteria         | 1                        | 0.1   |
|                                         | <i>Myxococcus xanthus</i>            | $\delta$ -proteobacteria         | 9                        | 0.5   |
|                                         | <i>Prostheco bacter debontii</i>     | <i>Verrucomicrobia</i>           | 1                        | 0.8   |
|                                         | <i>Prostheco bacter dejongeii</i>    | <i>Verrucomicrobia</i>           | 7                        | 5.3   |
|                                         | <i>Prostheco bacter fluviatilis</i>  | <i>Verrucomicrobia</i>           | 4                        | 2.9   |
|                                         | <i>Prostheco bacter vanneervanii</i> | <i>Verrucomicrobia</i>           | 1                        | 0.6   |
|                                         | <i>Streptococcus pneumoniae</i>      | <i>Firmicutes</i>                | 4                        | 11.4  |
|                                         | <i>Thiomonas intermedia</i>          | $\beta$ -proteobacteria          | 1                        | 2.2   |
|                                         | <i>Treponema primitia</i>            | <i>Spirochaetes</i>              | 1                        | 1.1   |
|                                         | <i>Vibrio cholerae</i>               | $\gamma$ -proteobacteria         | 3                        | 0.2   |
|                                         | Vesicles - nested                    | <i>Agrobacterium tumefaciens</i> | $\alpha$ -proteobacteria | 2     |
| <i>Bacillus subtilis</i>                |                                      | <i>Firmicutes</i>                | 1                        | 1.9   |
| <i>Bdellovibrio bacteriovorus</i>       |                                      | $\delta$ -proteobacteria         | 1                        | 0.3   |
| <i>Borrelia burgdorferi</i>             |                                      | <i>Spirochaetes</i>              | 1                        | 2.2   |
| <i>Brucella abortus</i>                 |                                      | $\alpha$ -proteobacteria         | 2                        | 3.7   |
| <i>Caulobacter crescentus</i>           |                                      | $\alpha$ -proteobacteria         | 53                       | 2.4   |
| <i>Escherichia coli</i>                 |                                      | $\gamma$ -proteobacteria         | 4                        | 0.3   |
| <i>Halothiobacillus neapolitanus c2</i> |                                      | $\gamma$ -proteobacteria         | 5                        | 2.6   |
| <i>Helicobacter hepaticus</i>           |                                      | $\epsilon$ -proteobacteria       | 2                        | 6.1   |
| <i>Helicobacter pylori</i>              |                                      | $\epsilon$ -proteobacteria       | 10                       | 1.8   |
| <i>Hyphomonas neptunium</i>             |                                      | $\alpha$ -proteobacteria         | 3                        | 0.3   |
| Strain JT5 ( <i>Dysgonomonas</i> )      |                                      | <i>Bacteroidetes</i>             | 2                        | 4.7   |
| <i>Myxococcus xanthus</i>               |                                      | $\delta$ -proteobacteria         | 23                       | 1.3   |
| <i>Prostheco bacter debontii</i>        |                                      | <i>Verrucomicrobia</i>           | 3                        | 2.3   |
| <i>Prostheco bacter dejongeii</i>       |                                      | <i>Verrucomicrobia</i>           | 3                        | 2.3   |
| <i>Prostheco bacter fluviatilis</i>     |                                      | <i>Verrucomicrobia</i>           | 1                        | 0.7   |
| <i>Prostheco bacter vanneervanii</i>    |                                      | <i>Verrucomicrobia</i>           | 2                        | 1.1   |
| <i>Ralstonia eutropha</i>               |                                      | $\beta$ -proteobacteria          | 2                        | 3.2   |
| <i>Serpens flexibilis</i>               |                                      | $\gamma$ -proteobacteria         | 1                        | 10    |
| <i>Sphingopyxis alaskensis</i>          |                                      | $\alpha$ -proteobacteria         | 1                        | 4.5   |

|                        |                                         |                                    |    |      |
|------------------------|-----------------------------------------|------------------------------------|----|------|
|                        | <i>Streptococcus pneumoniae</i>         | <i>Firmicutes</i>                  | 1  | 2.9  |
|                        | <i>Tetrasphaera remis</i>               | <i>Actinobacteria</i>              | 1  | 2.5  |
|                        | <i>Thiomonas intermedia</i>             | $\beta$ - <i>proteobacteria</i>    | 1  | 2.2  |
| Vesicles - periplasmic | <i>Agrobacterium tumefaciens</i>        | $\alpha$ - <i>proteobacteria</i>   | 2  | 0.1  |
|                        | <i>Bdellovibrio bacteriovorus</i>       | $\delta$ - <i>proteobacteria</i>   | 2  | 0.6  |
|                        | <i>Brucella abortus</i>                 | $\alpha$ - <i>proteobacteria</i>   | 3  | 5.6  |
|                        | <i>Campylobacter jejuni</i>             | $\epsilon$ - <i>proteobacteria</i> | 1  | 1.7  |
|                        | <i>Caulobacter crescentus</i>           | $\alpha$ - <i>proteobacteria</i>   | 16 | 0.7  |
|                        | <i>Escherichia coli</i>                 | $\gamma$ - <i>proteobacteria</i>   | 6  | 0.5  |
|                        | <i>Halothiobacillus neapolitanus c2</i> | $\gamma$ - <i>proteobacteria</i>   | 22 | 11.5 |
|                        | <i>Helicobacter hepaticus</i>           | $\epsilon$ - <i>proteobacteria</i> | 2  | 6.1  |
|                        | <i>Helicobacter pylori</i>              | $\epsilon$ - <i>proteobacteria</i> | 3  | 0.5  |
|                        | <i>Hyphomonas neptunium</i>             | $\alpha$ - <i>proteobacteria</i>   | 3  | 0.3  |
|                        | <i>Myxococcus xanthus</i>               | $\delta$ - <i>proteobacteria</i>   | 1  | 0.1  |
|                        | <i>Prostheco bacter de jonegi</i>       | <i>Verrucomicrobia</i>             | 1  | 0.8  |
|                        | <i>Prostheco bacter fluviatilis</i>     | <i>Verrucomicrobia</i>             | 2  | 1.4  |
|                        | <i>Prostheco bacter vanneerveni</i>     | <i>Verrucomicrobia</i>             | 3  | 1.7  |
|                        | <i>Ruminococcus flavefaciens</i>        | <i>Firmicutes</i>                  | 2  | 18.2 |
|                        | <i>Thiomicrospira crunogena</i>         | $\gamma$ - <i>proteobacteria</i>   | 1  | 4.5  |
|                        | <i>Thiomonas intermedia</i>             | $\beta$ - <i>proteobacteria</i>    | 1  | 2.2  |
|                        | <i>Vibrio cholerae</i>                  | $\gamma$ - <i>proteobacteria</i>   | 2  | 0.2  |
